# Supplementary material for: Assemblage and functional categorization of dung beetles (Coleoptera: Scarabaeinae) from the Pantanal
Source: PeerJ. 2017 Nov 8;5:e3978. doi: 10.7717/peerj.3978 (PMC5681849; doi:10.7717/peerj.3978)
Supplement: Supplemental Information 2 [file peerj-05-3978-s002.xls]

## Sheet: An.aff.villosus
Indivíduo	área da asa	comp. do pronoto	comp. do élitro	alt. do prosterno	larg. apical	comp. tibia média	area tibia anterior	tamanho	razão alar	razão tibial
1	14.653	2.056	3.811	1.991	0.217	1.618	0.543	5.867	2.49753	0.134116
2	14.199	2.36	3.34	2.03	0.258	1.656	0.555	5.7	2.49105	0.155797
3	13.046	2.56	3.071	2.144	0.184	1.708	0.658	5.631	2.31682	0.107728
4	12.587	2.057	3.573	1.767	0.288	1.576	0.51	5.63	2.2357	0.182741
5	14.456	2.187	3.194	1.817	0.319	1.629	0.657	5.381	2.68649	0.195826
Média	13.7882	2.244	3.3978	1.9498	0.2532	1.6374	0.5846	5.6418	2.44552	0.155242
Desvio Padrão	0.916015	0.216145	0.297112	0.15564	0.0539972	0.0488549	0.0685587	0.174911	0.175665	0.035733

## Sheet: A.carbonarius
Indivíduo	área da asa	comp. do pronoto	comp. do élitro	alt. do prosterno	larg. apical	comp. tibia média	area tibia anterior	tamanho	razão alar	razão tibial
1	18.229	2.311	2.746	1.927	0.61	1.208	0.498	5.057	3.60471	0.504967
2	15.228	2.036	2.912	2.367	0.559	1.113	0.473	4.948	3.07761	0.502246
4	11.385	1.98	2.618	1.975	0.477	0.949	0.38	4.598	2.47608	0.502634
5	12.917	1.851	2.884	2.123	0.529	0.941	0.325	4.735	2.72798	0.562168
6	15.348	1.853	3.439	2.382	0.604	1.09	0.412	5.292	2.90023	0.554128
7	15.243	1.979	3.099	2.776	0.489	0.924	0.317	5.078	3.00177	0.529221
8	17.267	2.226	3.297	1.95	0.595	1.22	0.404	5.523	3.12638	0.487705
9	15.518	1.975	3.346	2.162	0.579	1.059	0.517	5.321	2.91637	0.546742
10	16.97	1.903	3.271	2.01	0.481	1.104	0.395	5.174	3.27986	0.435688
11	13.66	1.862	3.167	2.321	0.511	0.911	0.329	5.029	2.71625	0.560922
12	20.482	2.117	3.263	2.348	0.419	1.256	0.471	5.38	3.80706	0.333599
13	16.624	2.081	3.413	2.4	0.57	0.999	0.387	5.494	3.02585	0.570571
14	14.317	1.801	2.888	2.154	0.561	1.142	0.403	4.689	3.05332	0.491243
15	15.602	1.842	3.315	1.937	0.439	0.955	0.372	5.157	3.0254	0.459686
16	17.543	2.309	2.883	2.044	0.544	1.28	0.52	5.192	3.37885	0.425
17	17.333	1.891	3.201	2.178	0.491	1.206	0.454	5.092	3.40397	0.407131
18	18.317	1.978	3.482	2.211	0.577	1.269	0.578	5.46	3.35476	0.454689
19	15.791	2.166	3.048	2.022	0.574	1.2041	0.566	5.214	3.02858	0.476705
20	19.539	2.176	3.35	2.196	0.678	1.2743	0.576	5.526	3.53583	0.532057
21	18.025	2.094	3.296	2.242	0.547	1.105	0.594	5.39	3.34416	0.495023
22	16.643	2.26	3.218	2.239	0.624	1.203	0.511	5.478	3.03815	0.518703
23	15.869	2.112	3.371	1.965	0.622	1.169	0.419	5.483	2.89422	0.532079
24	15.841	2.059	3.303	2.243	0.58	1.242	0.524	5.362	2.95431	0.466989
25	18.313	2.156	3.196	2.504	0.676	1.087	0.513	5.352	3.42171	0.621895
26	16.089	2.053	3.214	2.255	0.576	1.058	0.453	5.267	3.05468	0.544423
27	16.242	2.234	3.114	2.084	0.442	1.065	0.374	5.348	3.03702	0.415023
28	18.87	2.046	3.363	2.647	0.659	1.284	0.534	5.409	3.48863	0.51324
29	16.222	2.161	3.304	2.55	0.486	1.16	0.486	5.465	2.96834	0.418966
30	17.514	2.074	2.843	2.292	0.488	1.162	0.393	4.917	3.56193	0.419966
Média	16.4462	2.05469	3.16703	2.22428	0.551276	1.1255	0.454414	5.22172	3.14497	0.492531
Desvio Padrão	1.94532	0.145792	0.224218	0.216409	0.0696942	0.115683	0.0805741	0.257179	0.301746	0.0621603

## Sheet: A.sp.
Indivíduo	área da asa	comp. do pronoto	comp. do élitro	alt. do prosterno	larg. apical	comp. tibia média	area tibia anterior	tamanho	razão alar	razão tibial
1	16.851	1.727	3.102	1.889	0.48	1.098	0.391	4.829	3.48954	0.437158
2	14.641	1.962	2.807	1.315	0.507	0.973	0.42	4.769	3.07004	0.521069
3	17.695	1.879	2.99	1.801	0.326	0.9	0.332	4.869	3.63422	0.362222
4	17	1.721	3.304	1.61	0.436	1.094	0.515	5.025	3.38308	0.398537
5	14.201	1.542	3.167	1.809	0.569	1.084	0.45	4.709	3.01571	0.524908
6	12.951	1.753	2.739	1.801	0.467	1.01	0.444	4.492	2.88313	0.462376
7	12.84	1.515	2.913	1.949	0.395	0.968	0.272	4.428	2.89973	0.408058
8	12.295	1.782	2.888	1.835	0.385	0.946	0.511	4.67	2.63276	0.406977
9	16.828	1.749	3.21	2.132	0.555	1.171	0.542	4.959	3.39343	0.473954
10	12.192	1.561	3.052	1.76	0.555	0.906	0.333	4.613	2.64297	0.612583
11	14.083	1.578	2.817	1.552	0.509	1.03	0.467	4.395	3.20432	0.494175
12	14.3397	1.597	3.006	1.693	0.506	0.904	0.335	4.603	3.11529	0.559735
13	15.975	1.546	3.411	1.826	0.497	1.076	0.389	4.957	3.22272	0.461896
14	15.908	1.74	3.118	1.733	0.476	1.156	0.494	4.858	3.2746	0.411765
15	13.257	1.725	3.005	1.45	0.484	0.894	0.416	4.73	2.80275	0.541387
16	12.322	1.662	3.139	1.62	0.43	0.973	0.342	4.801	2.56655	0.441932
17	15.712	1.716	3.221	1.692	0.4	0.95	0.444	4.937	3.1825	0.421053
18	12.949	1.493	2.879	1.694	0.478	1.001	0.316	4.372	2.9618	0.477522
19	15.727	1.924	3.119	2.001	0.354	1.081	0.399	5.043	3.11858	0.327475
20	14.789	1.6	3.245	1.739	0.394	1.063	0.409	4.845	3.05243	0.370649
21	14.701	1.739	2.906	1.762	0.532	1.126	0.422	4.645	3.16491	0.472469
22	21.079	1.579	3.329	1.73	0.487	1.013	0.391	4.908	4.29482	0.48075
23	15.192	1.516	3.097	1.87	0.541	1.152	0.515	4.613	3.2933	0.469618
24	13.232	1.605	2.927	1.708	0.4996	0.839	0.425	4.532	2.91968	0.595471
25	18.53	1.866	3.169	1.823	0.429	1.243	0.531	5.035	3.68024	0.345133
26	16.078	1.811	3.049	1.833	0.462	0.924	0.355	4.86	3.30823	0.5
27	16.799	1.79	3.152	1.643	0.518	1.09	0.453	4.942	3.39923	0.475229
28	12.596	1.707	2.922	1.9622	0.401	0.964	0.263	4.629	2.72111	0.415975
29	17.692	1.624	3.015	1.611	0.471	0.926	0.317	4.639	3.81375	0.508639
30	14.989	1.349	3.303	1.684	0.491	0.998	0.465	4.652	3.22206	0.491984
Média	15.1148	1.6786	3.0667	1.75091	0.46782	1.01843	0.411933	4.7453	3.17878	0.462357
Desvio Padrão	2.12626	0.140291	0.168872	0.162287	0.0613651	0.0979344	0.0762278	0.193285	0.373094	0.068927

## Sheet: Can.barbacenicum
Indivíduo	área da asa	comp. do pronoto	comp. do élitro	alt. do prosterno	larg. apical	comp. tibia média	area tibia anterior	tamanho	razão alar	razão tibial
1	10.941	1.723	2.523	1.524	0.33	0.987	0.354	4.246	2.57678	0.334347
2	7.319	1.522	2.481	1.365	0.325	0.826	0.252	4.003	1.82838	0.393462
3	9.16	1.143	2.715	1.227	0.216	0.722	0.194	3.858	2.37429	0.299169
4	11.227	1.902	2.6	1.314	0.356	1.085	0.465	4.502	2.49378	0.328111
5	10.614	1.793	2.643	1.288	0.373	0.974	0.395	4.436	2.3927	0.382957
6	11.874	1.781	2.553	1.577	0.428	1.101	0.462	4.334	2.73973	0.388738
7	9.816	1.259	2.889	1.311	0.379	1.065	0.396	4.148	2.36644	0.355869
8	10.254	1.471	2.439	1.27	0.355	1.018	0.417	3.91	2.62251	0.348723
9	10.928	1.897	2.828	1.477	0.413	1.12	0.542	4.725	2.3128	0.36875
10	12.883	1.795	2.935	1.454	0.391	1.24	0.634	4.73	2.72368	0.315323
11	9.475	1.504	2.731	1.477	0.44	1.051	0.488	4.235	2.23731	0.418649
12	8.73	1.733	2.244	1.161	0.296	0.819	0.292	3.977	2.19512	0.361416
13	8.78	1.591	2.469	1.395	0.472	1.124	0.433	4.06	2.16256	0.419929
14	9.808	1.571	2.717	1.262	0.452	1.086	0.444	4.288	2.28731	0.416206
15	10.825	1.465	2.941	1.192	0.477	1.04	0.442	4.406	2.45688	0.458654
16	8.795	1.674	2.573	1.157	0.34	0.925	0.461	4.247	2.07087	0.367568
17	6.759	1.449	2.383	0.791	0.286	1.039	0.388	3.832	1.76383	0.275265
18	10.898	1.806	2.806	1.254	0.52	1.22	0.334	4.612	2.36297	0.42623
19	11.049	1.691	2.995	1.426	0.395	1.084	0.461	4.686	2.35787	0.364391
20	12.254	1.953	2.832	1.196	0.473	1.206	0.489	4.785	2.56092	0.392206
21	12.239	1.875	2.607	1.421	0.456	0.977	0.594	4.482	2.7307	0.466735
22	10.742	1.903	2.731	1.248	0.415	0.986	0.514	4.634	2.31808	0.420892
23	13.912	2.192	2.822	1.321	0.529	1.168	0.613	5.014	2.77463	0.452911
24	15.944	2.148	3.233	1.427	0.557	1.333	0.75	5.381	2.96302	0.417854
25	11.366	1.634	3.073	1.242	0.328	1.024	0.369	4.707	2.4147	0.320312
26	11.117	1.576	3.046	1.414	0.432	1.253	0.529	4.622	2.40524	0.344773
27	12.119	1.616	3.266	1.195	0.386	0.994	0.489	4.882	2.48238	0.38833
28	13.145	1.896	2.678	1.098	0.544	1.249	0.459	4.574	2.87385	0.435548
29	12.021	1.855	2.906	1.636	0.47	1.043	0.479	4.761	2.52489	0.450623
30	11.267	1.947	2.816	1.545	0.348	1.055	0.51	4.763	2.36553	0.329858
Média	10.8754	1.71217	2.74917	1.32217	0.406067	1.06047	0.454967	4.46133	2.42466	0.38146
Desvio Padrão	1.88348	0.236051	0.24314	0.169611	0.0812446	0.135035	0.112808	0.367696	0.271159	0.0502999

## Sheet: Can.cuprinu
Indivíduo	área da asa	comp. do pronoto	comp. do élitro	alt. do prosterno	larg. apical	comp. tibia média	area tibia anterior	tamanho	razão alar	razão tibial
1	19.904	2.436	2.91	1.974	0.307	1.156	0.565	5.346	3.72316	0.265571
2	20.795	2.437	2.84	2.071	0.278	0.976	0.502	5.277	3.94069	0.284836
3	22.842	2.342	3.508	1.982	0.457	1.186	0.761	5.85	3.90462	0.385329
4	21.703	2.449	2.738	2.183	0.401	1.012	0.594	5.187	4.18411	0.396245
5	21.187	2.107	3.149	2.176	0.426	1.178	0.665	5.256	4.03101	0.36163
6	20.14	2.505	2.362	1.766	0.422	1.023	0.346	4.867	4.13807	0.412512
7	19.549	2.586	2.746	1.993	0.328	0.8	0.858	5.332	3.66635	0.41
8	20.191	1.807	3.285	2.097	0.494	1.188	0.566	5.092	3.96524	0.415825
9	17.34	2.426	2.475	1.891	0.431	0.965	0.637	4.901	3.53805	0.446632
10	16.662	2.337	3.1	1.945	0.421	1.299	0.632	5.437	3.06456	0.324095
11	19.713	2.393	2.883	1.993	0.424	1.119	0.473	5.276	3.73635	0.37891
12	17.097	2.443	2.942	2.005	0.331	1.27	0.51	5.385	3.17493	0.26063
13	19.123	2.393	3.115	1.925	0.476	1.2	0.738	5.508	3.47186	0.396667
14	21.087	2.854	3.148	2.341	0.416	1.168	0.745	6.002	3.51333	0.356164
15	19.52	2.328	3.324	2.152	0.421	1.194	0.67	5.652	3.45364	0.352596
16	18.62	2.167	2.51	1.845	0.429	1.169	0.454	4.677	3.98118	0.36698
17	15.691	2.057	2.943	2.281	0.329	1.108	0.669	5	3.1382	0.296931
18	20.294	2.366	3.382	2.494	0.378	1.334	1.015	5.748	3.53062	0.283358
19	19.621	3.798	3.001	2.014	0.487	1.285	0.591	6.799	2.88587	0.378988
20	23.681	2.627	3.067	1.928	0.436	1.104	0.552	5.694	4.15894	0.394928
21	20.093	2.37	2.965	2.089	0.369	1.487	0.633	5.335	3.76626	0.248151
22	17.132	2.588	2.565	1.882	0.352	1.04	0.557	5.153	3.32467	0.338462
23	23.078	2.629	3.107	1.977	0.541	1.376	0.848	5.736	4.02336	0.393169
24	22.739	2.412	3.291	2.136	0.605	1.213	0.865	5.703	3.9872	0.498763
25	19.839	1.977	2.929	2.289	0.372	1.01	0.64	4.906	4.04382	0.368317
26	19.624	2.698	3.013	2.009	0.438	1.194	0.634	5.711	3.43618	0.366834
27	22.34	2.546	3.33	1.936	0.538	1.342	0.74	5.876	3.80191	0.400894
28	16.744	2.004	3.197	1.919	0.484	1.148	0.504	5.201	3.21938	0.421603
29	23.153	2.792	3.536	2.251	0.588	1.296	0.838	6.328	3.65882	0.453704
30	18.408	2.753	2.841	2.288	0.335	1.214	0.657	5.594	3.29067	0.275947
Média	19.9303	2.45423	3.00673	2.06107	0.4238	1.16847	0.648633	5.46097	3.65843	0.364489
Desvio Padrão	2.11914	0.352977	0.294938	0.167776	0.0801896	0.14126	0.143923	0.450495	0.359023	0.0618599

## Sheet: Can.viride
Indivíduo	área da asa	comp. do pronoto	comp. do élitro	alt. do prosterno	larg. apical	comp. tibia média	area tibia anterior	tamanho	razão alar	razão tibial
1	32.946	3.409	3.934	2.585	0.894	1.922	1.267	7.343	4.48672	0.46514
2	26.852	2.945	4.12	1.914	0.624	1.82	1.202	7.065	3.80071	0.342857
3	30.887	3.016	4.638	2.588	0.823	1.99	1.396	7.654	4.03541	0.413568
4	32.484	2.824	4.265	2.159	0.636	1.755	1.19	7.089	4.58231	0.362393
5	26.263	2.894	4.142	2.161	0.487	1.524	1.176	7.036	3.73266	0.319554
6	30.568	2.85	3.964	2.411	0.629	1.704	0.895	6.814	4.48606	0.369131
7	20.401	2.367	3.662	2.588	0.572	1.587	0.768	6.029	3.38381	0.360428
8	31.443	3.444	4.147	2.495	0.684	1.768	1.296	7.591	4.14214	0.386878
9	32.202	3.231	3.974	2.479	0.628	1.663	1.092	7.205	4.4694	0.377631
10	35.963	3.065	4.632	2.905	0.689	1.812	1.672	7.697	4.67234	0.380243
11	28.515	2.383	4.014	2.009	0.594	1.638	0.891	6.397	4.45756	0.362637
12	29.25	3	4.061	2.184	0.776	1.625	1.127	7.061	4.14247	0.477538
13	21.455	2.46	3.776	2.08	0.537	1.667	0.892	6.236	3.44051	0.322136
14	25.632	2.416	3.84	1.974	0.366	1.49	0.852	6.256	4.09719	0.245638
15	35.57	3.389	4.31	2.689	0.558	1.792	1.576	7.699	4.62008	0.311384
16	37.246	3.791	3.924	2.524	0.743	1.921	1.435	7.715	4.82774	0.386778
17	26.226	2.927	4.073	2.404	0.564	1.543	0.892	7	3.74657	0.365522
18	28.223	2.462	4.571	2.218	0.63	1.787	0.843	7.033	4.01294	0.352546
19	24.149	2.5	3.884	2.021	0.493	1.45	0.841	6.384	3.78274	0.34
20	29.566	3.142	4.04	2.475	0.693	1.716	0.855	7.182	4.11668	0.403846
21	32.321	2.944	4.375	2.642	0.604	1.862	1.049	7.319	4.41604	0.324382
22	22.548	2.65	3.952	2.373	0.527	1.564	0.747	6.602	3.41533	0.336957
23	34.562	2.854	4.998	2.796	0.729	1.916	1.543	7.852	4.40168	0.38048
24	28.549	2.816	4.145	2.102	0.577	1.594	1.009	6.961	4.10128	0.361982
25	30.639	3.165	4.452	2.743	0.611	1.871	1.243	7.617	4.02245	0.326563
26	34.154	2.8005	4.9	2.573	0.725	1.823	1.597	7.7005	4.4353	0.397696
27	23.393	2.725	3.806	2.091	0.564	1.51	0.764	6.531	3.58184	0.37351
28	20.579	2.792	3.649	1.996	0.536	1.489	0.783	6.441	3.195	0.359973
29	27.215	2.833	4.305	2.368	0.622	1.842	1.1	7.138	3.81269	0.337676
30	20.115	2.307	3.473	1.979	0.381	1.395	0.649	5.78	3.4801	0.273118
media	28.6639	2.88005	4.1342	2.35087	0.616533	1.70133	1.08807	7.01425	4.06326	0.360606
desvpad	4.87958	0.35667	0.359453	0.282139	0.11542	0.161971	0.287307	0.563982	0.440559	0.0470474

## Sheet: Can.sp.2
Indivíduo	área da asa	comp. do pronoto	comp. do élitro	alt. do prosterno	larg. apical	comp. tibia média	area tibia anterior	tamanho	razão alar	razão tibial
1	6.958	1.627	2.056	1.321	0.301	0.797	0.247	3.683	1.88922	0.377666
2	5.42	1.194	1.822	1.212	0.233	0.589	0.176	3.016	1.79708	0.395586
3	6.551	1.549	1.72	1.251	0.271	0.702	0.254	3.269	2.00398	0.38604
4	5.292	1.64	1.849	1.167	0.31	0.663	0.194	3.489	1.51677	0.467572
5	5.918	1.568	1.676	1.123	0.295	0.63	0.214	3.244	1.82429	0.468254
6	6.349	1.426	1.989	1.337	0.381	0.689	0.241	3.415	1.85915	0.552975
7	7.271	1.575	2.132	1.26	0.351	0.777	0.3	3.707	1.96142	0.451737
8	7.975	1.648	1.916	1.496	0.3	0.809	0.2	3.564	2.23765	0.370828
9	6.4	1.582	2.045	1.413	0.3	0.809	0.253	3.627	1.76454	0.370828
10	6.693	1.646	2.02	1.225	0.317	0.732	0.252	3.666	1.8257	0.43306
11	6.927	1.566	1.879	1.33	0.235	0.644	0.212	3.445	2.01074	0.364907
12	7.517	1.461	2.11	1.253	0.306	0.834	0.303	3.571	2.10501	0.366906
13	8.672	1.575	2.18	1.387	0.37	0.649	0.306	3.755	2.30945	0.570108
14	7.803	1.486	2.269	1.318	0.312	0.754	0.301	3.755	2.07803	0.413793
15	6.731	1.55	2.135	1.219	0.26	0.821	0.286	3.685	1.82659	0.316687
16	7.842	1.584	2.278	1.409	0.329	0.729	0.269	3.862	2.03055	0.451303
17	8.188	1.63	2.135	1.719	0.252	0.658	0.3	3.765	2.17477	0.382979
18	6.577	1.374	2.086	1.178	0.271	0.78	0.262	3.46	1.90087	0.347436
19	7.796	1.551	2.169	1.491	0.414	0.84	0.227	3.72	2.0957	0.492857
20	7.132	1.267	1.922	1.23	0.275	0.784	0.238	3.189	2.23644	0.350765
21	6.656	1.568	2.129	1.383	0.3	0.802	0.317	3.697	1.80038	0.374065
22	7.932	1.56	2.135	1.359	0.318	0.769	0.272	3.695	2.14668	0.413524
23	7.959	1.695	2.077	1.29	0.442	0.839	0.257	3.772	2.11002	0.526818
24	7.396	1.494	2.133	1.531	0.338	0.655	0.259	3.627	2.03915	0.516031
25	7.419	1.349	2.313	1.257	0.291	0.714	0.339	3.662	2.02594	0.407563
26	5.26	1.278	1.866	1.132	0.254	0.554	0.205	3.144	1.67303	0.458484
27	6.455	1.446	1.889	1.2	0.199	0.657	0.233	3.335	1.93553	0.302892
28	4.853	1.355	1.897	1.09	0.312	0.778	0.185	3.252	1.49231	0.401028
29	5.548	1.259	2.001	1.096	0.227	0.64	0.206	3.26	1.70184	0.354687
30	7.259	1.532	2.015	1.311	0.305	0.732	0.254	3.547	2.04652	0.416667
Média	6.89163	1.50117	2.0281	1.2996	0.3023	0.727667	0.252067	3.52927	1.94731	0.416802
Desvio Padrão	0.97241	0.132578	0.158569	0.140245	0.0535268	0.0795172	0.042091	0.223431	0.201988	0.0672384

## Sheet: Can.sp.3
Indivíduo	área da asa	comp. do pronoto	comp. do élitro	alt. do prosterno	larg. apical	comp. tibia média	area tibia anterior	tamanho	razão alar	razão tibial
1	10.612	1.787	2.504	2.491	0.469	1.041	0.574	4.291	2.47308	0.450528

## Sheet: Ca.histrio
Indivíduo	área da asa	comp. do pronoto	comp. do élitro	alt. do prosterno	larg. apical	comp. tibia média	area tibia anterior	tamanho	razão alar	razão tibial
1	36.447	3.212	5.313	3.013	0.454	2.239	1.204	8.525	4.27531	0.202769
2	37.52	3.288	5.79	3.442	0.608	2.766	1.944	9.078	4.13307	0.219812
3	31.615	3.595	5.28	3.205	0.519	2.008	1.466	8.875	3.56225	0.258466
4	36.895	3.473	5.585	2.939	0.572	2.629	1.476	9.058	4.07319	0.217573
5	35.172	3.144	5.146	2.791	0.475	2.309	1.1196	8.29	4.2427	0.205717
6	40.522	3.8	5.698	3.184	0.41	2.294	1.81	9.498	4.26637	0.178727
7	38.223	3.096	5.481	2.573	0.478	2.457	1.806	8.577	4.45645	0.194546
8	39.512	3.84	6.68	3.051	0.339	2.647	2.138	10.52	3.75589	0.12807
9	36.215	2.842	4.638	2.702	0.471	2.383	1.638	7.48	4.84158	0.19765
10	38.43	3.41	5.945	2.962	0.396	2.504	1.498	9.355	4.10796	0.158147
11	41.782	4.169	6.343	3.821	0.445	2.78	2.442	10.512	3.9747	0.160072
12	40.471	3.537	5.825	3.349	0.423	2.981	1.853	9.362	4.3229	0.141899
13	41.201	3.057	5.701	3.527	0.555	3.092	1.764	8.758	4.70438	0.179495
14	40.286	3.514	5.605	3.296	0.507	3.079	2.068	9.119	4.41781	0.164664
15	36.017	3.243	5.501	3.508	0.556	2.667	1.967	8.744	4.11905	0.208474
16	39.265	3.356	5.095	3.273	0.65	2.739	1.915	8.451	4.6462	0.237313
17	33.157	2.884	5.4	2.944	0.378	2.593	1.399	8.284	4.00254	0.145777
18	21.545	2.376	4.118	2.851	0.488	2.098	0.833	6.494	3.31768	0.232602
19	26.644	3.249	4.4	3.162	0.578	2.807	1.65	7.649	3.48333	0.205914
20	39.727	2.83	4.998	3.176	0.516	2.643	2.02	7.828	5.07499	0.195233
21	32.668	2.793	4.857	3.092	0.291	2.433	1.395	7.65	4.27033	0.119605
22	34.916	3.355	4.609	2.805	0.367	2.512	1.557	7.964	4.38423	0.146099
23	28.238	2.902	4.682	2.9	0.488	2.307	1.546	7.584	3.72336	0.21153
24	33.302	3.176	5.125	3.231	0.337	2.623	1.495	8.301	4.01181	0.128479
25	32.262	2.923	4.773	2.487	0.435	2.538	1.246	7.696	4.19205	0.171395
26	29.602	2.577	4.777	2.606	0.405	2.441	1.334	7.354	4.02529	0.165916
27	26.622	2.93	4.177	2.881	0.359	2.199	1.597	7.107	3.74588	0.163256
28	32.073	3.03	4.907	2.791	0.442	2.729	1.422	7.937	4.04095	0.161964
29	34.289	3.099	4.814	2.908	0.413	2.509	1.45	7.913	4.33325	0.164607
30	40.98	3.05	5.353	3.224	0.254	2.619	1.734	8.403	4.87683	0.0969836
Média	35.1866	3.19167	5.22053	3.05647	0.453633	2.55417	1.62622	8.4122	4.17941	0.178758
Desvio Padrão	5.05425	0.379949	0.599027	0.306224	0.0934605	0.263287	0.336969	0.918436	0.407645	0.0378108

## Sheet: Ca.lituratus
Indivíduo	área da asa	comp. do pronoto	comp. do élitro	alt. do prosterno	larg. apical	comp. tibia média	area tibia anterior	tamanho	razão alar	razão tibial
1	8.242	2.17	2.544	1.8	0.18	1.551	0.604	4.714	1.74841	0.116054
2	9.153	2.068	2.743	1.731	0.212	1.487	0.563	4.811	1.90252	0.142569
3	9.966	2.117	2.617	1.688	0.302	1.563	0.431	4.734	2.1052	0.193218
4	10.136	2.399	2.717	1.407	0.172	1.533	0.54	5.116	1.98124	0.112198
5	7.689	2.001	2.182	1.773	0.174	1.35	0.428	4.183	1.83815	0.128889
6	8.905	1.985	2.608	1.5	0.196	1.341	0.457	4.593	1.93882	0.14616
7	7.388	2.336	2.332	2.062	0.239	1.492	0.576	4.668	1.58269	0.160188
8	7.667	2.242	2.426	1.76	0.159	1.321	0.578	4.668	1.64246	0.120363
9	7.465	2.103	2.433	1.378	0.187	1.372	0.395	4.536	1.64572	0.136297
10	7.817	1.948	2.558	1.594	0.268	1.351	0.532	4.506	1.7348	0.198372
11	7.254	2.244	2.546	2.001	0.165	1.279	0.592	4.79	1.51441	0.129007
12	7.277	1.989	2.386	1.431	0.138	1.411	0.299	4.375	1.66331	0.097803
13	8.76	1.963	2.557	1.358	0.2	1.539	0.575	4.52	1.93805	0.129955
14	7.873	1.793	2.552	2.04	0.205	1.514	0.429	4.345	1.81197	0.135403
15	10.132	2.347	2.771	1.811	0.213	1.585	0.664	5.118	1.97968	0.134385
16	9.3	2.416	2.786	2.042	0.325	1.593	0.59	5.202	1.78777	0.204018
17	9.223	2.186	2.869	2.04	0.201	1.596	0.751	5.055	1.82453	0.12594
18	7.439	2.297	2.586	1.787	0.268	1.398	0.557	4.883	1.52345	0.191702
19	8.082	2.254	2.761	1.87	0.249	1.642	0.597	5.015	1.61157	0.151644
20	9.352	2.147	2.741	1.653	0.255	1.087	0.401	4.888	1.91326	0.234591
21	9.503	2.222	2.687	1.633	0.232	1.408	0.456	4.909	1.93583	0.164773
22	7.617	1.993	2.318	1.807	0.211	1.251	0.494	4.311	1.76688	0.168665
23	9.669	2.139	2.864	1.912	0.206	1.414	0.612	5.003	1.93264	0.145686
24	9.904	1.866	3.139	1.61	0.192	1.446	0.545	5.005	1.97882	0.13278
25	10.16	2.415	2.97	2.039	0.161	1.463	0.502	5.385	1.88672	0.110048
26	11.637	2.167	2.947	2.08	0.166	1.561	0.537	5.114	2.27552	0.106342
27	10.019	2.245	2.601	1.595	0.148	1.367	0.38	4.846	2.06748	0.108266
28	12.255	2.531	2.938	2.046	0.3	1.52	0.747	5.469	2.24081	0.197368
29	9.506	2.209	2.825	1.81	0.203	1.685	0.374	5.034	1.88836	0.120475
30	10.083	2.149	2.899	1.761	0.34	1.275	0.603	5.048	1.99742	0.266667
Média	8.98243	2.1647	2.66343	1.7673	0.215567	1.4465	0.526967	4.82813	1.85528	0.150328
Desvio Padrão	1.30824	0.174048	0.221074	0.220495	0.0526286	0.133125	0.106685	0.316133	0.191275	0.0405742

[truncated: 25 more sheets: Ca. maldonadoi, Ca.curvodilatatus, Ca.aff.ornatus, Ca.quinquemaculatus, Ca.daguerrei, C.bonariensis, C.milon, De.elongatum, Di.lycas, Di.nisus, Di.bos, Di.opacipennis, D.gazella, E.caribaeus, E.nigrovirens, Ge.cryptops, G.inermis, M.astyanax, O. appendiculatus, O.digitatus …]
